# Supplementary material
Source: Research Square preprint supplement (doi:10.21203/rs.3.rs-12088/v6)
Supplement: Supplementary file 1 [file 5d063f2bf0e4d27cd420a142.docx]

| COMPLICATED APPENDICITIS | ALT | | TOTAL | Χ2,df | p VALUE |
| --- | --- | --- | --- | --- | --- |
| <40 | >40 | 0.471,1 | > 0.05 |
| ABSENT | 74 | 1 | 75 |
| PRESENT | 35 | 0 | 35 |
| TOTAL | 109 | 1 | 110 |
| COMPLICATED APPENDICITIS | AST | | TOTAL | Χ2,df | p VALUE |
| < 40 | >40 | 14.545,1 | >0.05 |
| ABSENT | 75 | 0 | 75 |
| PRESENT | 35 | 0 | 35 |
| TOTAL | 110 | 0 | 110 |

| COMPLICATED APPENDICITIS | ALP | | TOTAL | Χ2,df | p VALUE |
| --- | --- | --- | --- | --- | --- |
| <130 n(%) | >130 n(%) | 0.217,1 | >0.05 |
| ABSENT | 57(76) | 18(24) | 75 |
| PRESENT | 28(80) | 7(20) | 35 |
| TOTAL | 85(77.3) | 25(22.7) |  |

| COMPLICATED APPENDICITIS | CRP | | TOTAL | p VALUE |
| --- | --- | --- | --- | --- |
| <0.6 n(%) | >0.6 n(%) | P<0.05 |
| ABSENT | 68(90.7) | 7(9.3) | 75 |
| PRESENT | 5(14) | 30(86) | 35 | Χ2= 61.802 |
| TOTAL | 73 | 37 | 110 | Df=1 |
